# Supplementary material
Source: PubMed Central journal article supplement (PMC6819094)
Supplement: jci-129-120879-s065.pdf [file jci-129-120879-s065.pdf]

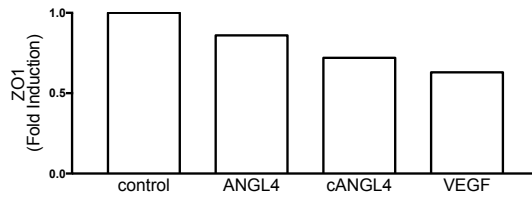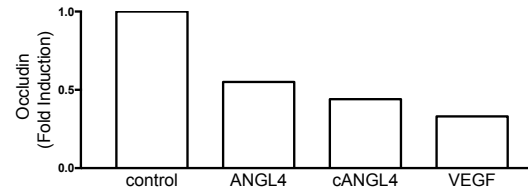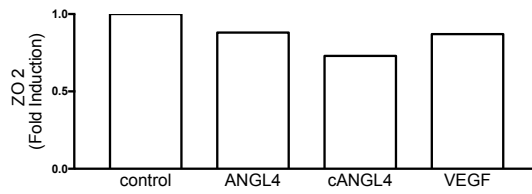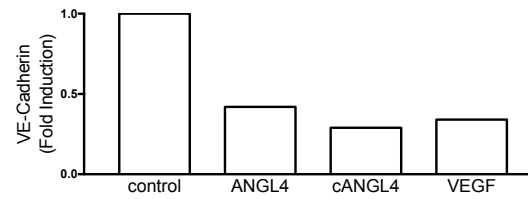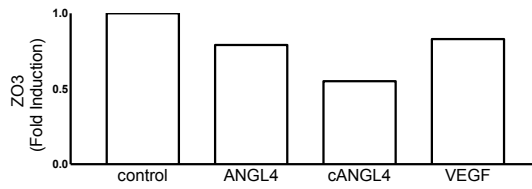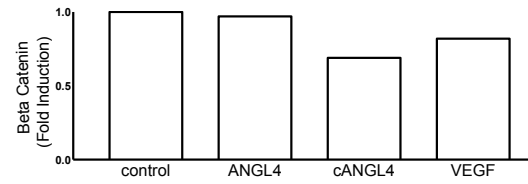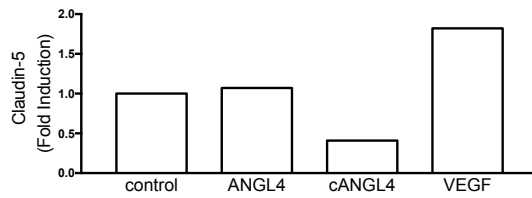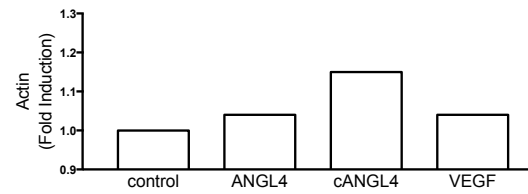

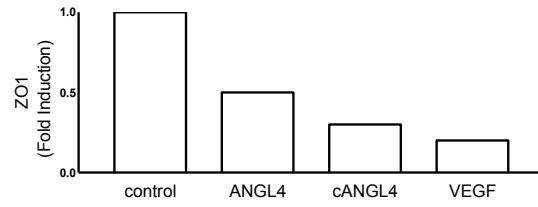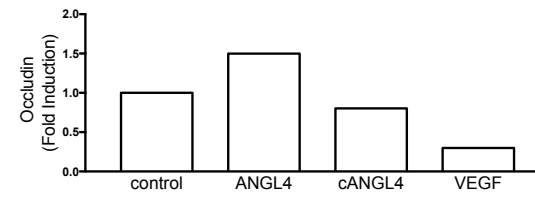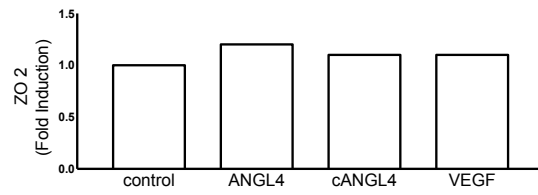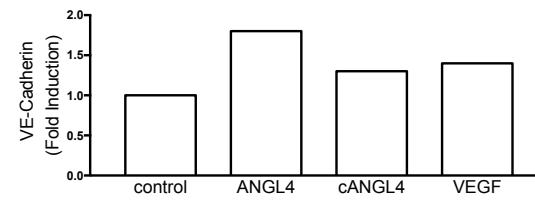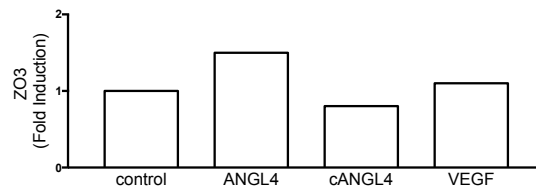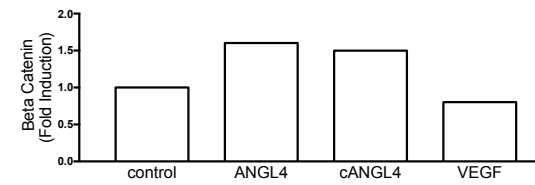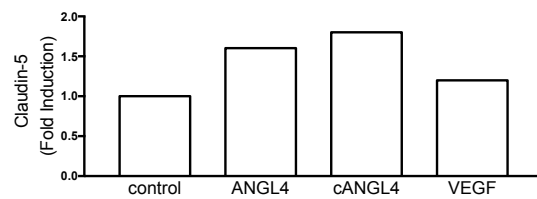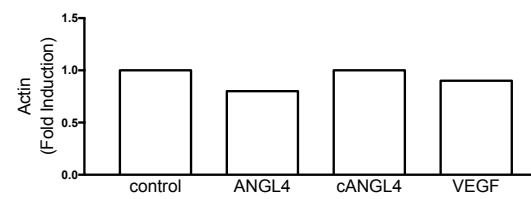

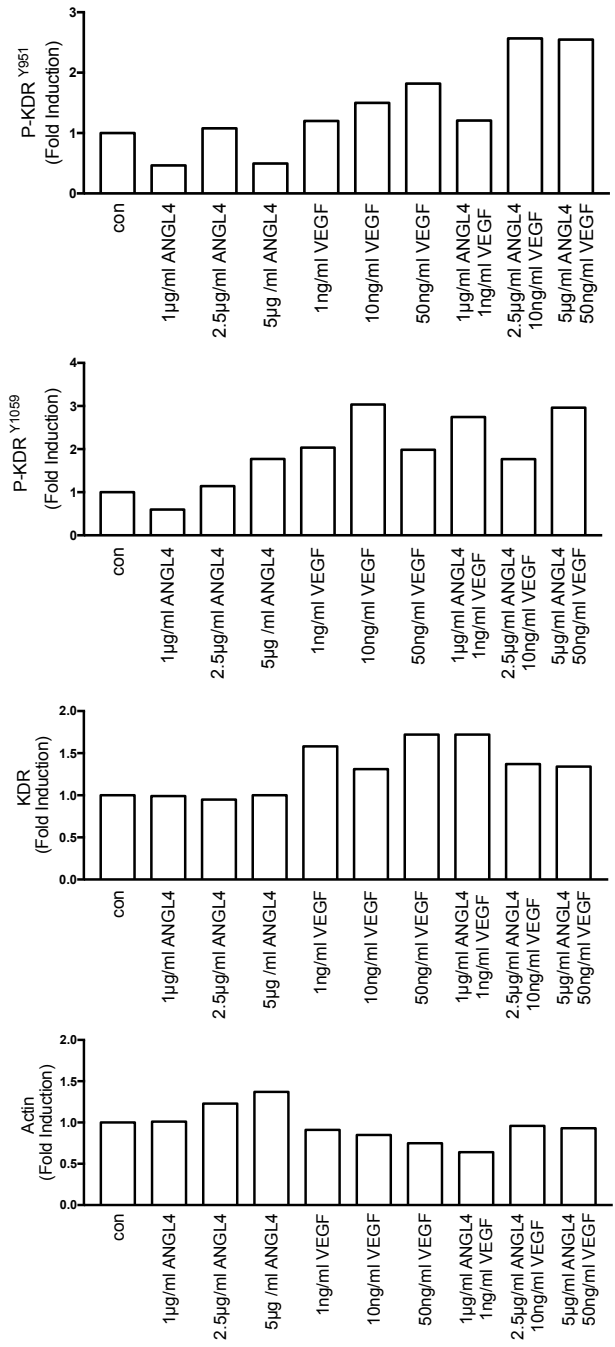

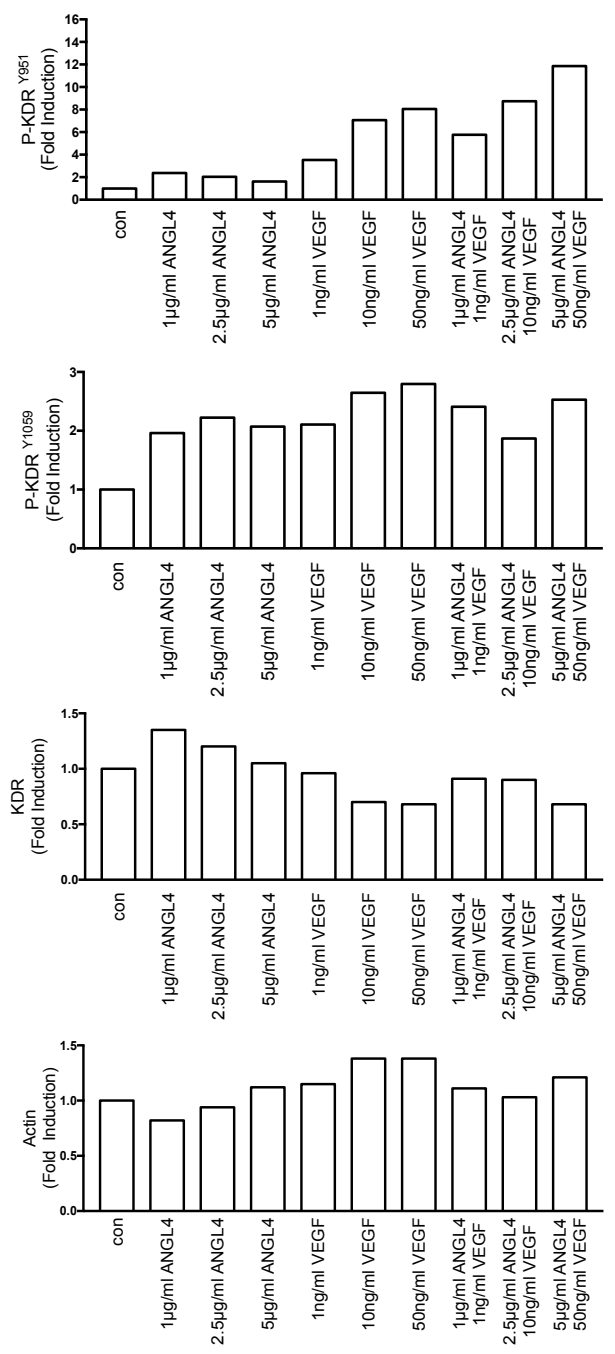

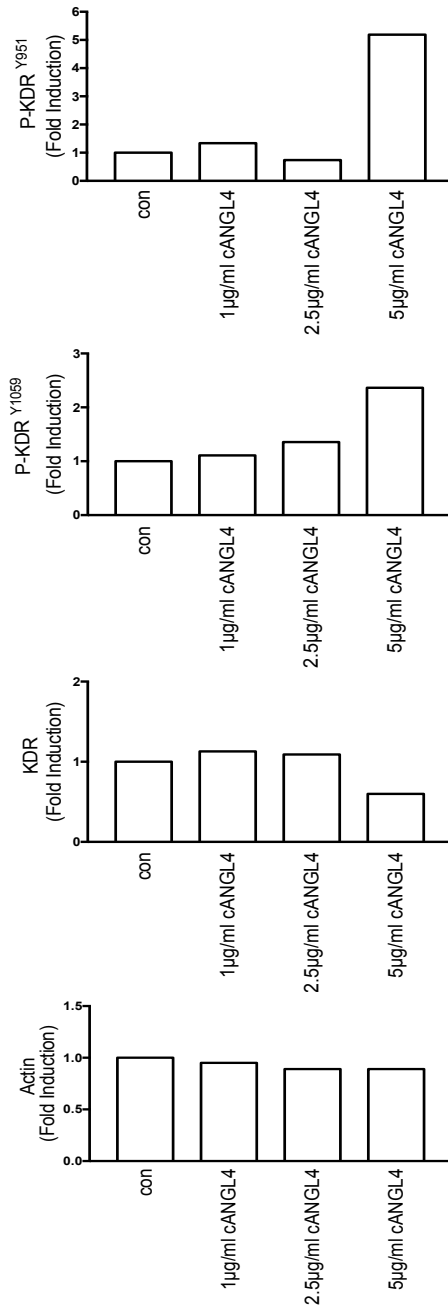

**Supplemental Fig. 1.** Quantification of Western blots of Figure 2D, showing the changes in AJ and TJ protein levels upon treatment of HUVEC with rhANGPTL4 (5  $\mu$ g/ml), rhcANGPTL4 (5  $\mu$ g/ml), or rhVEGF (50 ng/ml), for 24 hr. Levels of total actin were used for normalization.

**Supplemental Fig. 2.** Quantification of Western blots of Figure 2E, showing the changes in AJ and TJ protein levels upon treatment of hREC with rhANGPTL4 (5  $\mu$ g/ml), rhcANGPTL4 (5  $\mu$ g/ml), or rhVEGF (50 ng/ml), for 24 hr. Levels of total actin were used for normalization.

**Supplemental Fig. 3.** Quantification of Western blots of Figure 5D, showing KDR Phosphorylation on Tyr951 and Tyr1059 upon treatment of HUVECs with different doses of rhANGPTL4 ( $\mu\text{g/ml}$ ), rhVEGFA ( $\text{ng/ml}$ ), or both. Levels of total KDR were used for normalization.

**Supplemental Fig. 4.** Quantification of Western blots of Figure 5E, showing KDR Phosphorylation on Tyr951 and Tyr1059 upon treatment of hREC with different doses of rhANGPTL4 ( $\mu\text{g/ml}$ ), rhVEGFA ( $\text{ng/ml}$ ), or both. Levels of total KDR were used for normalization.

**Supplemental Fig. 5.** Quantification of Western blots of Figure 5H, showing KDR phosphorylation in Tyr951 and Tyr1059 upon treatment of HUVECs with rhcANGPTL4 ( $\mu\text{g/ml}$ ). Levels of total KDR were used for normalization.

**Supplemental Table 1.** Characteristics of DME patients from whom aqueous samples were collected for EC permeability assays.

| Patient | Age | Sex | *Phakic Status | OCT Central Subfield Thickness ( $\mu\text{m}$ ) | Best Corrected Visual Acuity (LogMAR) |
|---------|-----|-----|----------------|--------------------------------------------------|---------------------------------------|
| D1      | 63  | F   | P              | 276                                              | 0.301                                 |
| D2      | 52  | M   | PP             | 240                                              | 0.398                                 |
| D3      | 56  | M   | P              | 290                                              | 0.301                                 |
| D4      | 55  | F   | P              | 338                                              | 0.477                                 |
| D5      | 67  | F   | PP             | 475                                              | 0.602                                 |
| D6      | 57  | M   | P              | 365                                              | 0.796                                 |
| D7      | 51  | M   | P              | 355                                              | 0.796                                 |
| D8      | 67  | M   | PP             | 435                                              | 1.398                                 |
| D9      | 50  | F   | P              | 359                                              | 0.097                                 |
| D10     | 67  | F   | P              | 521                                              | 0.602                                 |

\*Phakic status at the time of sample collection. P, phakic; PP, pseudophakic. DME, diabetic macular edema. OCT, optical coherence tomography. All patients had not been treated with anti-VEGF therapy, steroid, or laser photocoagulation for at least 3 months prior to sample collection.



**Supplemental Table 2.** Characteristics of DME patients from whom aqueous samples were collected for ELISA analysis for VEGF and ANGPTL4.

| <b>Patient Characteristic</b> | <b>Control<br/>(N=36)</b> | <b>DME<br/>UnTx<br/>(N=6)</b> | <b>DME<br/>No recent<br/>Tx (N=13)</b> | <b>DME<br/>Recent Tx<br/>(N=6)</b> | <b>P</b> |
|-------------------------------|---------------------------|-------------------------------|----------------------------------------|------------------------------------|----------|
| Mean Age in Years $\pm$ SD    | 67.8 $\pm$ 11.3           | 55.3 $\pm$ 4.7                | 61.5 $\pm$ 7.5                         | 58.2 $\pm$ 5.1                     | 0.0081   |
| Males – no. (%)               | 17 (47.2)                 | 3 (50.0)                      | 9 (69.2)                               | 5 (83.3)                           | 0.27     |
| Pseudophakic – no. (%)        | 0 (0)                     | 0 (0)                         | 6 (46.2)                               | 1 (16.7)                           | 0.0001   |
| Prior vitrectomy – no. (%)    | 0 (0)                     | 0 (0)                         | 2 (15.4)                               | 0 (0)                              | 0.054    |
| Prior laser – no. (%)         | 0 (0)                     | 0 (0)                         | 8 (61.5)                               | 2 (33.3)                           | <0.0001  |
| Diabetes mellitus – no. (%)   | 0 (0)                     | 6 (100)                       | 13 (100)                               | 6 (100)                            | <0.0001  |
| CVD* – no. (%)                | 28 (77.8)                 | 6 (100)                       | 13 (100)                               | 6 (100)                            | 0.094    |

DME, diabetic macular edema. CVD, cardiovascular disease. UnTx, untreated. Tx, treatment

DME UnTx, DME patients without any prior history of anti-VEGF therapy in sample eye

DME No recent Tx, DME patients who have not received anti-VEGF therapy for 12 weeks or longer in sample eye.

DME Recent Tx, DME patients treated with their first anti-VEGF injection in sample eye within 6 weeks of sample collection.

\*Includes any patient with a history of hypertension, hypercholesterolemia, coronary artery disease, or cerebral vascular accident.

**Supplemental Table 3: Kinetics of the binding of ANGPTL4 and ANGPTL4 to NRP1 and NRP2.** The association ( $k_a$ ) and dissociation ( $k_d$ ) rate constants and the equilibrium association (KA) and dissociation (KD) constants were calculated with the BIAeval 3.2 evaluation software, using different concentrations of analytes onto the NRP immobilized sensor chip.

| Ligand | Analyte  | $k_a$ (1/Ms)       | $k_d$ (1/s)           | KA (1/M)           | KD (M)                | Chi2  |
|--------|----------|--------------------|-----------------------|--------------------|-----------------------|-------|
| NRP1   | ANGPTL4  | $8.94 \times 10^5$ | $2.24 \times 10^{-3}$ | $3.99 \times 10^8$ | $2.50 \times 10^{-9}$ | 1.81  |
| NRP1   | VEGF     | $4.58 \times 10^5$ | $3.05 \times 10^{-3}$ | $1.50 \times 10^8$ | $6.65 \times 10^{-9}$ | 0.194 |
| NRP1   | cANGPTL4 | $7.66 \times 10^3$ | $2.29 \times 10^{-4}$ | $3.34 \times 10^7$ | $2.99 \times 10^{-8}$ | 1.01  |
| NRP2   | ANGPTL4  | $4.53 \times 10^5$ | $3.20 \times 10^{-3}$ | $1.42 \times 10^8$ | $7.07 \times 10^{-9}$ | 1.41  |
| NRP2   | VEGF     | $3.40 \times 10^5$ | $2.10 \times 10^{-3}$ | $1.62 \times 10^8$ | $6.18 \times 10^{-9}$ | 0.151 |
| NRP2   | cANGPTL4 | $5.22 \times 10^5$ | $4.30 \times 10^{-3}$ | $1.21 \times 10^8$ | $8.24 \times 10^{-9}$ | 0.753 |
